# Supplementary material
Source: publisher figshare collection journal article supplement (https://sage.figshare.com/ndownloader/files/22090110)
Supplement: Supplementary file 1 [file 22090110]

## Effects of Sulfonylureas on Periodontopathic Bacteria-Induced Inflammation

Y. Kawahara, T. Kaneko, Y. Yoshinaga, Y. Arita, K. Nakamura, C. Koga, A. Yoshimura, and R. Sakagami

### Appendix

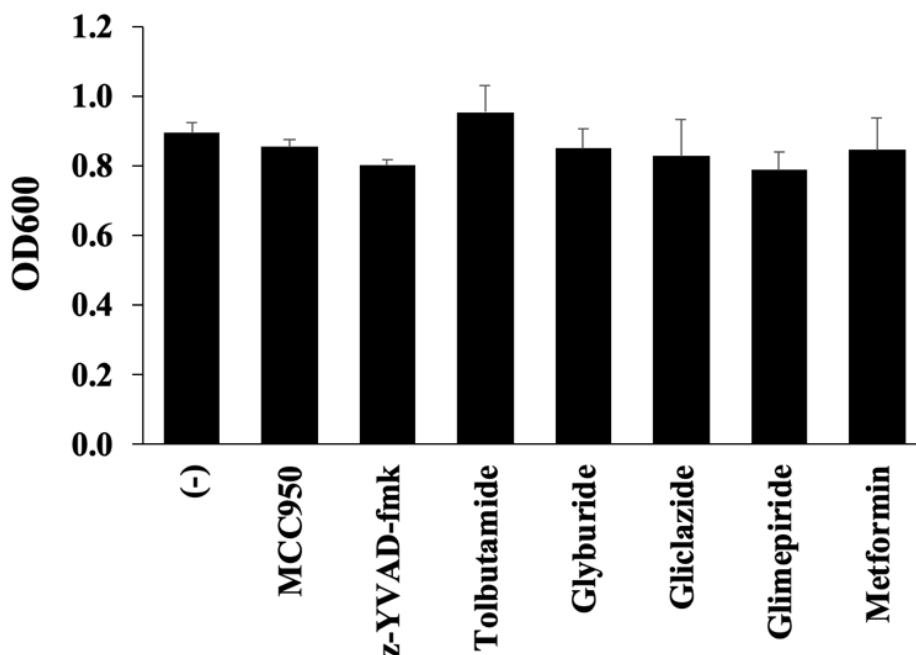

### Appendix Figure 1

Effects of inhibitors and hypoglycemic drugs on growth of THP-1 macrophage-like cells. THP-1 macrophage-like cells ( $1 \times 10^5$  cells/100  $\mu$ L/well in 96-well plates) were stimulated with MCC950 (10  $\mu$ M), z-YVAD-fmk (2  $\mu$ M), tolbutamide (100  $\mu$ M), glyburide (100  $\mu$ M), glimepiride (100  $\mu$ M), or metformin (5  $\mu$ M). Twenty-four hours after incubation, 10  $\mu$ L of the MTT reagent (5 mg/mL, Sigma-Aldrich) was added into the well and incubated for an additional 4 h. After adding 100  $\mu$ L of the solubilizing solution (10% SDS in 10 mM HCl) overnight, optical density (OD) was measured colorimetrically at 600 nm. There were no statistically significant differences between samples and DMSO by one-factor ANOVA, followed by the Tukey's test.

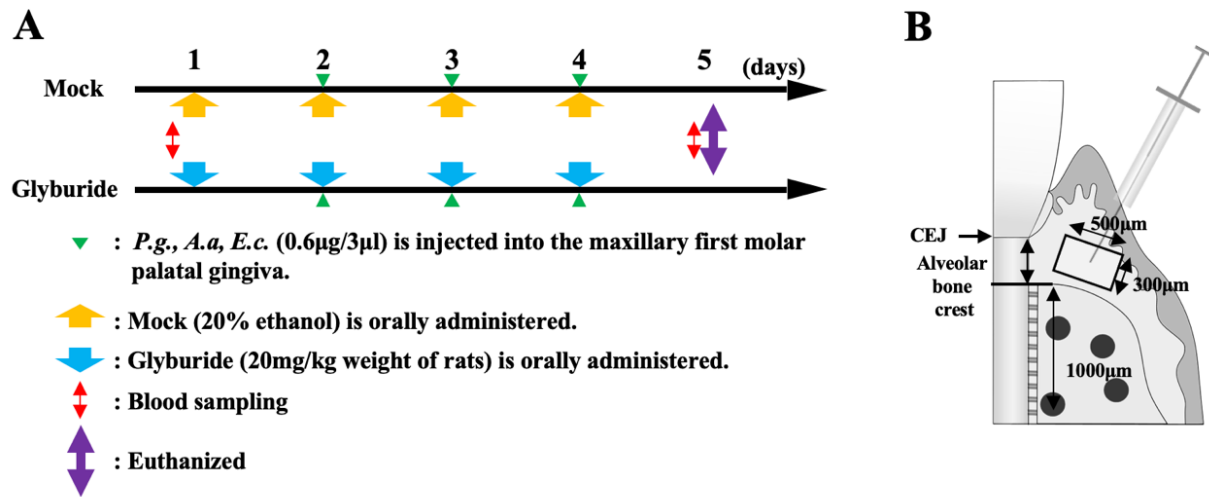

## Appendix Figure 2

(A) Schedule of *in vivo* experiments. Periodontitis in rats was generated by injection of *P. gingivalis*, *A. actinomycetemcomitans*, or *E. coli* into the mesial gingiva in the upper first molar. Rats were divided into two groups: glyburide group (20 mg/kg weight of rats via oral administration with a tube every 24 h) and the mock group (20% Ethanol). Rats were euthanized 24 h after the third bacterial injection, and histological specimens of the periodontal tissues were stained by hematoxylin and eosin (H&E). Tartrate-resistant acid phosphatase (TRAP) was visualized enzymatically to identify osteoclasts. Whole blood was collected from rats on days 1 and 5. (B) Schema of histological analyses. The number of inflammatory cells in 500 μm × 300 μm of connective tissue above the bone crest. The distance between the cement-enamel junction (CEJ) to the alveolar bone crest. TRAP-positive cells on the bone surface of the periodontal ligament between the bone crest and the point 1,000 μm away from the bone crest.

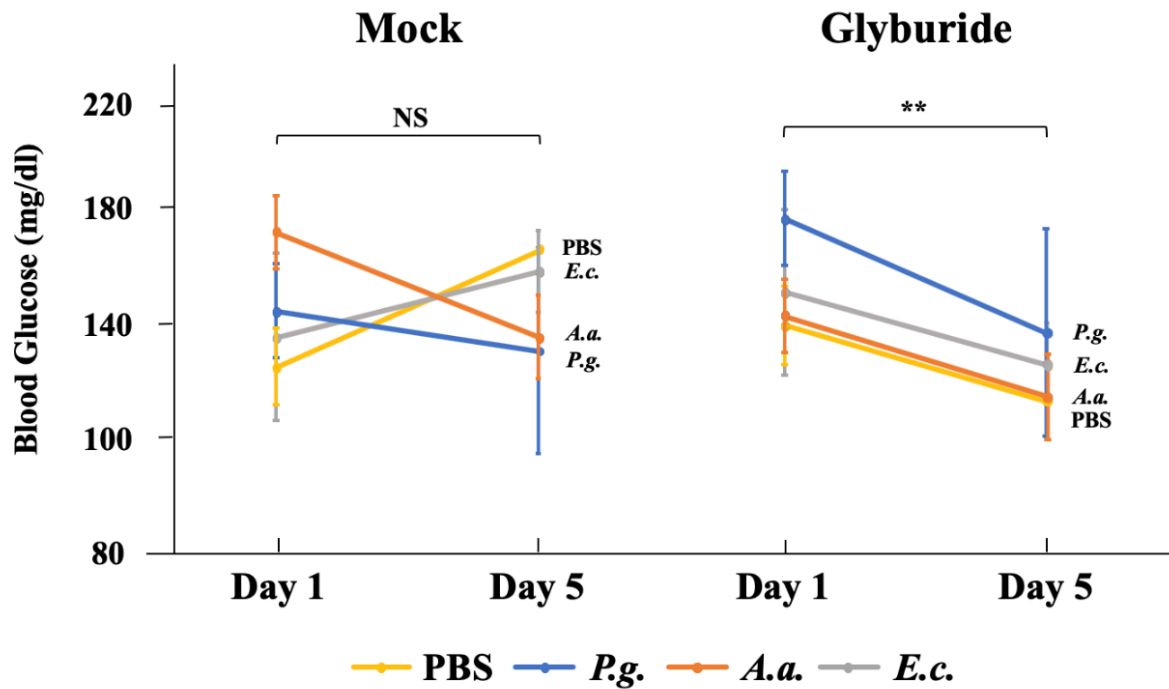

### Appendix Figure 3

Changes in blood glucose levels of glyburide-administered rats. Glyburide in 20% ethanol (20 mg/kg) or 20% ethanol (mock) was orally administered to each group (8 rats / group) every 24 h using a tube. Each bacterial sample was injected into the gingiva of rats as described in the Materials & Methods. Blood samples were collected from the retro-orbital venous plexus of the rats at baseline (Day 1) and before sacrifice (Day 5). Serum was prepared from the collected blood. Using 10  $\mu$ L of the serum, the blood glucose level was measured using a Glutestace Ace R (GlucocardTM G Black, Arkray, Kyoto, Japan). Statistical analysis was performed using the Wilcoxon-Mann-Whitney sign-ranked test. *P. g.*, *P. gingivalis*; *A. a.*, *A. actinomycetemcomitans*; *E. c.*, *E. coli*. \*\* $P < 0.01$ . NS: not significant.

## Appendix Table

Chemical structures of sulfonylureas used in this study. Glyburide and glimepiride, but neither tolbutamide nor gliclazide, could suppress IL-1 $\beta$  release from THP-1 macrophage-like cells stimulated with periodontal bacteria. Sulfonylurea, which is an essential structure for binding ATP-sensitive potassium channels (resulting in insulin release), is shown in red. Benzamide and pyrrolamide groups in glyburide and glimepiride are shown in blue.

| Generation | Sulfonylureas | Inhibition of IL-1 $\beta$ release | Chemical structure                                                                   |
|------------|---------------|------------------------------------|--------------------------------------------------------------------------------------|
| 1          | Tolbutamide   | ( - )                              | 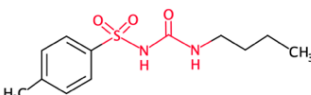   |
| 2          | Gliclazide    | ( - )                              |    |
|            | Glyburide     | ( + )                              |  |
| 3          | Glimepiride   | ( + )                              |  |
